# Supplementary material
Source: PubMed Central journal article supplement (PMC6620606)
Supplement: NIHMS983290-supplement-SI.pdf [file NIHMS983290-supplement-SI.pdf]

# **Novel polyfluorinated compounds identified using high resolution mass spectrometry downstream of manufacturing facilities near Decatur, Alabama, USA**

## **Supporting Information**

Number of pages = 14

**Seth Newton<sup>1</sup>, Rebecca McMahan<sup>2</sup>, James A. Stoeckel<sup>3</sup>, Michael Chislock<sup>3</sup>, Andrew Lindstrom<sup>1</sup>, Mark Strynar<sup>1,\*</sup>**

1. National Exposure Research Laboratory, U.S. Environmental Protection Agency, Research Triangle Park, North Carolina 27711, United States
2. Oak Ridge Institute for Science and Education, Oak Ridge, Tennessee 37831 United States
3. School of Fisheries, Aquaculture, and Aquatic Science, Auburn University, Auburn, AL, U.S.A

**\*Corresponding Author:**

**Address: 109 T.W. Alexander Dr., Durham, NC**

**Phone: 919-541-3706**

**e-mail: [strynar.mark@epa.gov](mailto:strynar.mark@epa.gov).**

## Table of Contents

|                                                                                                                                                                    |    |
|--------------------------------------------------------------------------------------------------------------------------------------------------------------------|----|
| Materials and QA/QC.....                                                                                                                                           | 3  |
| Table S1- Levels of legacy PFASs in water (ng L <sup>-1</sup> ).....                                                                                               | 4  |
| Table S2- Levels of legacy PFASs in sediment (ng g <sup>-1</sup> dry weight).....                                                                                  | 4  |
| Table S3 - Formulas, observed m/z, ppm error, proposed structure, smiles, Schymanski scale<br>identification level, and selected physical-chemical properties..... | 5  |
| Calculations of adjusted mass defect plots.....                                                                                                                    | 8  |
| Figure S1 - Adjusted mass defect plot of top 100 features.....                                                                                                     | 8  |
| Figure S2 -MS/MS spectrum of C <sub>12</sub> H <sub>12</sub> F <sub>12</sub> O <sub>2</sub> .....                                                                  | 9  |
| Figure S3 - Total area (sum of all isomers) of different species and their relative percentages in related<br>series at Site 2.....                                | 10 |
| Figure S4 - MS/MS spectrum of the sulfate compound.....                                                                                                            | 11 |
| Figure S5 - Two possible structures for the sulfate compound.....                                                                                                  | 11 |
| Figure S6 - MS spectra of MeFBSAA.....                                                                                                                             | 12 |
| Figure S7 – Structures, names, and abbreviations for perfluorobutane sulfonamides (PBSAs).....                                                                     | 13 |
| SI References.....                                                                                                                                                 | 14 |

## Materials

Acetonitrile (ACN), dichloromethane (DCM), and methanol (B&J Brand High Purity Solvent) were purchased from Honeywell Burdick & Jackson (Muskegon, MI, USA). Ammonium acetate was purchased from Sigma Aldrich (St. Louis, MO, USA). Ultrapure deionized (DI) water was generated in house from a Barnsted Easypure UV/UF (Dubuque, IA, USA) coupled with activated charcoal and ion exchange resin canisters.

Target compounds were purchased in premixed ampules prepared by Wellington Laboratories, (Guelph, Ontario, Canada, PFCA MXA standard) containing the following compounds: perfluorobutanoic acid (PFBA), perfluoropentanoic acid (PFPeA), perfluorohexanoic acid (PFHxA), perfluoroheptanoic acid (PFHpA), perfluorooctanoic acid (PFOA), perfluorononanoic acid (PFNA), perfluorodecanoic acid (PFDA), perfluorobutane sulfonate (PFBS), perfluorohexane sulfonate, (PFHxS), and perfluorooctane sulfonate (PFOS). For internal standards (IS), the following compounds were purchased from Wellington Laboratories: 1,2-<sup>13</sup>C<sub>2</sub>-labeled perfluorohexanoic acid (<sup>13</sup>C<sub>2</sub>-PFHxA), 1,2-<sup>13</sup>C<sub>2</sub>-labeled perfluoroundecanoic acid (<sup>13</sup>C<sub>2</sub>-PFUnDA), and <sup>18</sup>O<sub>2</sub>-sodium perfluorohexanesulfonate (<sup>18</sup>O<sub>2</sub>-PFHxS). 1,2,3,4,5,6,7,8-<sup>13</sup>C<sub>8</sub>-labeled PFOA (<sup>13</sup>C<sub>8</sub>-PFOA) solution was purchased from Cambridge Isotope Laboratories, (Andover, MA), and <sup>18</sup>O<sub>2</sub>-ammonium perfluorooctane sulfonate (<sup>18</sup>O<sub>2</sub>-PFOS) was purchased from Research Triangle Institute (Research Triangle Park, NC). N-methyl perfluorobutane sulfonamidoacetic acid (N-MeFBSAA) was obtained from Jennifer Field's research group at Oregon State University.

## QA/QC

Method blanks (1L DI water for water samples and an empty sampling container for sediment samples) were analyzed along with each batch of samples and solvent blanks were injected on the instrument as the first and last samples in the batch. Water samples were analyzed within 48 hours of arrival and sediments were frozen at -80 °C until analysis to ensure minimal loss of compounds of interest. A six point calibration curve for each matrix was created by spiking a set of method blanks and processing them along with the samples. The limit of quantification (LOQ) was defined as the lowest point on the standard curve (10 ng L<sup>-1</sup> for water and 0.2 ng g<sup>-1</sup> for sediment).

Table S1- Levels of legacy PFASs in water (ng L<sup>-1</sup>). LOQ = limit of quantification = 10 ng L<sup>-1</sup> for all compounds.

|       | Site 1 | Site 2 | Site 3 | Site 4 | Site 5 | Site 6 | Site 7 | Site 8 | Site 9 |
|-------|--------|--------|--------|--------|--------|--------|--------|--------|--------|
| PFBA  | 14     | 60     | 13     | <LOQ   | <LOQ   | <LOQ   | <LOQ   | <LOQ   | 10     |
| PFPeA | <LOQ   | 23     | <LOQ   |
| PFBS  | 36     | 160    | 10     | <LOQ   | <LOQ   | <LOQ   | <LOQ   | <LOQ   | <LOQ   |
| PFHxA | 16     | 93     | 18     | 11     | 11     | <LOQ   | <LOQ   | <LOQ   | 11     |
| PFHeA | 11     | 44     | 15     | <LOQ   | <LOQ   | <LOQ   | <LOQ   | <LOQ   | 11     |
| PFHxS | <LOQ   | 39     | <LOQ   |
| PFOA  | 21     | 120    | 53     | <LOQ   | 11     | <LOQ   | <LOQ   | <LOQ   | 11     |
| PFNA  | <LOQ   |
| PFOS  | 33     | 220    | 71     | <LOQ   | 15     | <LOQ   | <LOQ   | <LOQ   | <LOQ   |
| PFDA  | <LOQ   |
| Total | 132    | 759    | 180    | 11     | 37     | <LOQ   | <LOQ   | <LOQ   | 43     |

Table S2- Levels of legacy PFASs in sediment (ng g<sup>-1</sup> dry weight). LOQ = limit of quantification = 2 ng g<sup>-1</sup> for all compounds. Values shown that are less than the LOQ should be considered estimates.

|       | Site 1 | Site 2 | Site 3 | Site 4 | Site 5 | Site 6 | Site 7 | Site 8 | Site 9 |
|-------|--------|--------|--------|--------|--------|--------|--------|--------|--------|
| PFBA  | <LOQ   | 1.4    | 0.52   | 0.30   | <LOQ   | <LOQ   | <LOQ   | <LOQ   | <LOQ   |
| PFPeA | <LOQ   | 0.39   | <LOQ   | 0.30   | <LOQ   | <LOQ   | <LOQ   | <LOQ   | <LOQ   |
| PFBS  | 0.59   | 0.80   | 0.20   | <LOQ   | <LOQ   | <LOQ   | <LOQ   | <LOQ   | <LOQ   |
| PFHxA | <LOQ   | 0.64   | 0.28   | 1.1    | <LOQ   | <LOQ   | <LOQ   | <LOQ   | <LOQ   |
| PFHeA | <LOQ   | 0.95   | 0.75   | 1.0    | <LOQ   | <LOQ   | <LOQ   | <LOQ   | <LOQ   |
| PFHxS | <LOQ   | 0.99   | 0.33   | 0.21   | <LOQ   | <LOQ   | <LOQ   | <LOQ   | <LOQ   |
| PFOA  | 1.3    | 9.1    | 7.3    | 12     | <LOQ   | <LOQ   | <LOQ   | <LOQ   | <LOQ   |
| PFNA  | <LOQ   | <LOQ   | <LOQ   | 0.28   | <LOQ   | <LOQ   | <LOQ   | <LOQ   | <LOQ   |
| PFOS  | 13     | 23     | 32     | 32     | 1.7    | <LOQ   | 0.22   | <LOQ   | 1.5    |
| PFDA  | <LOQ   |
| Total | 15     | 38     | 41     | 47     | 1.7    | <LOQ   | 0.22   | <LOQ   | 1.5    |

Table S3 - Formulas, observed m/z, ppm error, proposed structure, smiles, Schymanski scale identification level, and selected physical-chemical properties predicted using Episuite™ 4.11

| Formula                                                        | Observed m/z | ppm error | Possible structure | SMILES                                                                   | Schymanski Scale Identification Level <sup>1</sup> | Log K <sub>ow</sub> | Log K <sub>oc</sub> | Probability for Rapid Biodegradation <sup>1</sup> | Log BCF <sup>2</sup> | Biotransformation half life (days) |
|----------------------------------------------------------------|--------------|-----------|--------------------|--------------------------------------------------------------------------|----------------------------------------------------|---------------------|---------------------|---------------------------------------------------|----------------------|------------------------------------|
| C <sub>4</sub> H <sub>4</sub> F <sub>4</sub> O <sub>2</sub>    | 159.0075     | 3.65      |                    | <chem>FC(F)CC(F)(F)C(=O)O</chem>                                         | 2B                                                 | 1.35                | 1.248               | 0.5601                                            | 0.5                  | 0.3064                             |
| C <sub>6</sub> H <sub>6</sub> F <sub>6</sub> O <sub>2</sub>    | 223.0204     | 4.62      |                    | <chem>FC(F)(CC(F)(F)C(=O)O)CC(F)F</chem>                                 | 2B                                                 | 2.81                | 2.138               | 0.3457                                            | 0.5                  | 1.115                              |
| C <sub>8</sub> H <sub>8</sub> F <sub>8</sub> O <sub>2</sub>    | 287.0329     | 3.80      |                    | <chem>FC(F)(CC(F)(F)C(=O)O)CC(F)(F)CC(F)F</chem>                         | 2B                                                 | 4.27                | 3.028               | 0.1313                                            | 0.5                  | 4.06                               |
| C <sub>10</sub> H <sub>10</sub> F <sub>10</sub> O <sub>2</sub> | 351.0453     | 2.93      |                    | <chem>FC(F)(CC(F)(F)C(=O)O)CC(F)(F)CC(F)(F)CC(F)F</chem>                 | 2B                                                 | 5.72                | 3.917               | -0.0831                                           | 1                    | 14.78                              |
| C <sub>12</sub> H <sub>12</sub> F <sub>12</sub> O <sub>2</sub> | 415.0578     | 2.60      |                    | <chem>FC(F)(CC(F)(F)C(=O)O)CC(F)(F)CC(F)(F)CC(F)(F)CC(F)F</chem>         | 2B                                                 | 7.18                | 4.807               | -0.2976                                           | 1.75                 | 53.8                               |
| C <sub>14</sub> H <sub>14</sub> F <sub>14</sub> O <sub>2</sub> | 479.0700     | 1.73      |                    | <chem>FC(F)(CC(F)(F)C(=O)O)CC(F)(F)CC(F)(F)CC(F)(F)CC(F)(F)CC(F)F</chem> | 2B                                                 | 8.64                | 5.697               | -0.512                                            | 1                    | 195.9                              |

|                                 |          |      |                                                                                     |                                                                             |    |       |       |         |       |         |
|---------------------------------|----------|------|-------------------------------------------------------------------------------------|-----------------------------------------------------------------------------|----|-------|-------|---------|-------|---------|
| $C_{16}H_{16}F_{16}O_2$         | 543.0817 | 0.15 | 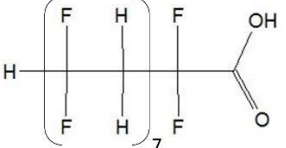   | FC(F)(CC(F)(F)C(=O)O)CC(F)(F)CC(F)(F)CC(F)(F)CC(F)(F)CC(F)(F)F              | 2B | 10.1  | 6.587 | -0.7264 | 0.5   | 713     |
| $C_{18}H_{18}F_{18}O_2$         | 607.0945 | 0.71 |    | FC(F)(CC(F)(F)C(=O)O)CC(F)(F)CC(F)(F)CC(F)(F)CC(F)(F)CC(F)(F)CC(F)F         | 2B | 11.55 | 7.477 | -0.9408 | 0.5   | 2596    |
| $C_{20}H_{20}F_{20}O_2$         | 671.1066 | 0.12 |    | FC(F)(CC(F)(F)C(=O)O)CC(F)(F)CC(F)(F)CC(F)(F)CC(F)(F)CC(F)(F)CC(F)(F)CC(F)F | 2B | 13.01 | 8.367 | -1.1552 | 0.5   | 9449    |
| $C_7H_2F_{12}O_2$               | 344.9800 | 4.44 | none proposed                                                                       | none proposed                                                               | 4  | N/A   | N/A   | N/A     | N/A   | N/A     |
| $C_6H_4F_8O_2$                  | 259.0015 | 3.78 | none proposed                                                                       | none proposed                                                               | 4  | N/A   | N/A   | N/A     | N/A   | N/A     |
| $C_4H_2F_8SO_3$                 | 280.9532 | 4.77 |    | FC(F)(C(F)(F)S(=O)(=O)O)C(F)(F)C(F)F                                        | 2B | 1.21  | 2.089 | 0.1698  | 0.5   | 0.1705  |
| $C_4H_6F_4SO_4$                 | 224.9856 | 4.98 |   | FC(F)(OS(=O)(=O)O)CC(F)(F)C                                                 | 3  | -0.01 | 2.124 | 0.272   | 0.5   | 0.04537 |
| $C_7H_6F_9NSO_4$<br>(N-MeFBSAA) | 369.9805 | 2.57 |  | FC(F)(C(F)(F)C(F)(F)C(F)(F)S(=O)(=O)N(C)C)C(=O)O                            | 1  | 3.06  | 2.119 | -0.4287 | 0.5   | 3.159   |
| $C_4H_2F_9NSO_2$<br>(FBSA)      | 297.9592 | 2.65 |  | FC(F)(C(F)(F)S(N)(=O)=O)C(F)(F)C(F)(F)F                                     | 2B | 3.13  | 2.951 | -0.4671 | 1.729 | 1.137   |
| $C_4HF_9SO_2$                   | 282.9479 | 1.38 |  | FC(F)(C(F)(F)S(=O)(=O)O)C(F)(F)C(F)(F)F                                     | 2B | 2.55  | 2.791 | -0.4599 | 1.347 | 0.8247  |

|                                                                                  |                       |      |                                                                                   |                                                                                   |    |      |       |         |       |         |
|----------------------------------------------------------------------------------|-----------------------|------|-----------------------------------------------------------------------------------|-----------------------------------------------------------------------------------|----|------|-------|---------|-------|---------|
| C <sub>6</sub> H <sub>4</sub> F <sub>9</sub> NSO <sub>4</sub><br>(FBSAA)         | 355.9644              | 1.40 | 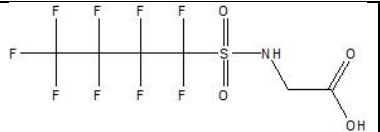 | FC(F)(C(F)(F)C(F)<br>(F)C(F)(F)S(=O)<br>(=O)NCC(O)=O                              | 2B | 2.85 | 2.112 | -0.422  | 0.5   | 0.2255  |
| C <sub>8</sub> H <sub>8</sub> F <sub>9</sub> NSO <sub>4</sub><br>(N-<br>EtFBSAA) | 383.9958              | 1.59 |  | FC(F)(C(F)(F)C(F)<br>(F)C(F)(F)S(=O)<br>(=O)N(CC(O)=O)<br>CC                      | 2B | 3.55 | 2.399 | -0.4354 | 0.5   | 0.6387  |
| C <sub>7</sub> H <sub>8</sub> F <sub>9</sub> NSO <sub>3</sub><br>(N-<br>MeFBSE)  | 402.0063 <sup>3</sup> | 1.24 |  | FC(F)(C(F)(F)C(F)<br>(F)C(F)(F)S(=O)<br>(=O)N(C)CCO                               | 2B | 2.83 | 2.24  | -0.336  | 1.533 | 1.116   |
| C <sub>8</sub> HF <sub>17</sub> SO <sub>3</sub><br>(PFOS)                        | 498.9307              | 2.14 |  | FC(F)(C(F)(F)S(=<br>O)(=O)O)C(F)(F)<br>C(F)(F)C(F)(F)C(F)<br>)C(F)(F)C(F)(F)<br>F | 1  | 4.49 | 4.855 | -1.1901 | 0.5   | 9.421   |
| C <sub>8</sub> HF <sub>15</sub> O <sub>2</sub><br>(PFOA)                         | 412.9668              | 2.32 |  | OC(=O)C(F)(F)C(<br>F)(F)C(F)(F)C(F)(<br>F)C(F)(F)C(F)(F)C<br>(F)(F)F              | 1  | 4.81 | 4.419 | -1.0009 | 0.5   | 26.32   |
| C <sub>4</sub> HF <sub>9</sub> SO <sub>3</sub><br>(PFBS)                         | 298.9436              | 3.91 |  | OS(=O)(=O)C(F)(<br>F)C(F)(F)C(F)(F)C<br>(F)(F)F                                   | 1  | 1.82 | 2.249 | -0.3592 | 0.5   | -0.3487 |

1. Based on Biowin1 (linear model)
2. Fish bioconcentration factor calculated using Episuite's regression based method
3. Observed as a formate adduct

## Calculations of adjusted mass defect plots

Mass defect plots can be used to screen for homologous series<sup>2,3</sup> which are common in fluorinated compound production (e.g., perfluorinated carboxylic acids and sulfonates). Several approaches exist to construct these plots but here we have chosen to make an adjusted mass defect plot as described by Lui et al.<sup>4</sup> based on Kendrick mass defect plots.<sup>5</sup>

To construct the adjusted mass defect plots for a homologous series differing by  $\text{CF}_2\text{CH}_2$ , the measured  $m/z$  of all compounds are adjusted by the ratio of the nominal to exact mass of  $\text{CF}_2\text{CH}_2$  (64/64.0124) resulting in what is called the Kendrick Mass:

$$1) \text{ Kendrick Mass} = m/z * 64/64.0124$$

The Kendrick mass is then rounded up and the difference is taken between the rounded mass and the Kendrick Mass:

$$2) \text{ Kendrick mass defect} = \text{Kendrick mass rounded up to the nearest whole number} - \text{Kendrick mass}$$

Next, 1 is added to any Kendrick mass defects that fall below 0.10 as the rounding may have resulted in splitting a series with Kendrick mass defects close to 1:

$$3) \text{ Adjusted Mass Defect} = \text{Kendrick mass defect} + 1 \text{ if Kendrick mass defect} < 0.1$$

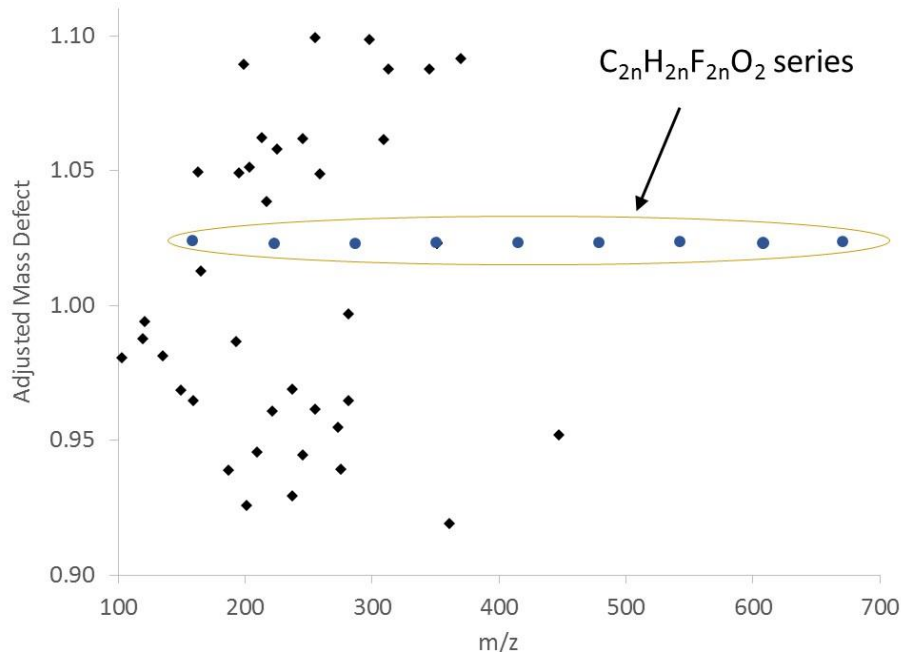

Figure S1 - Adjusted mass defect plot of top 100 features with the  $\text{C}_{2n}\text{H}_{2n}\text{F}_{2n}\text{O}_2$  carboxylic acid series circled where  $n = 2-10$ .



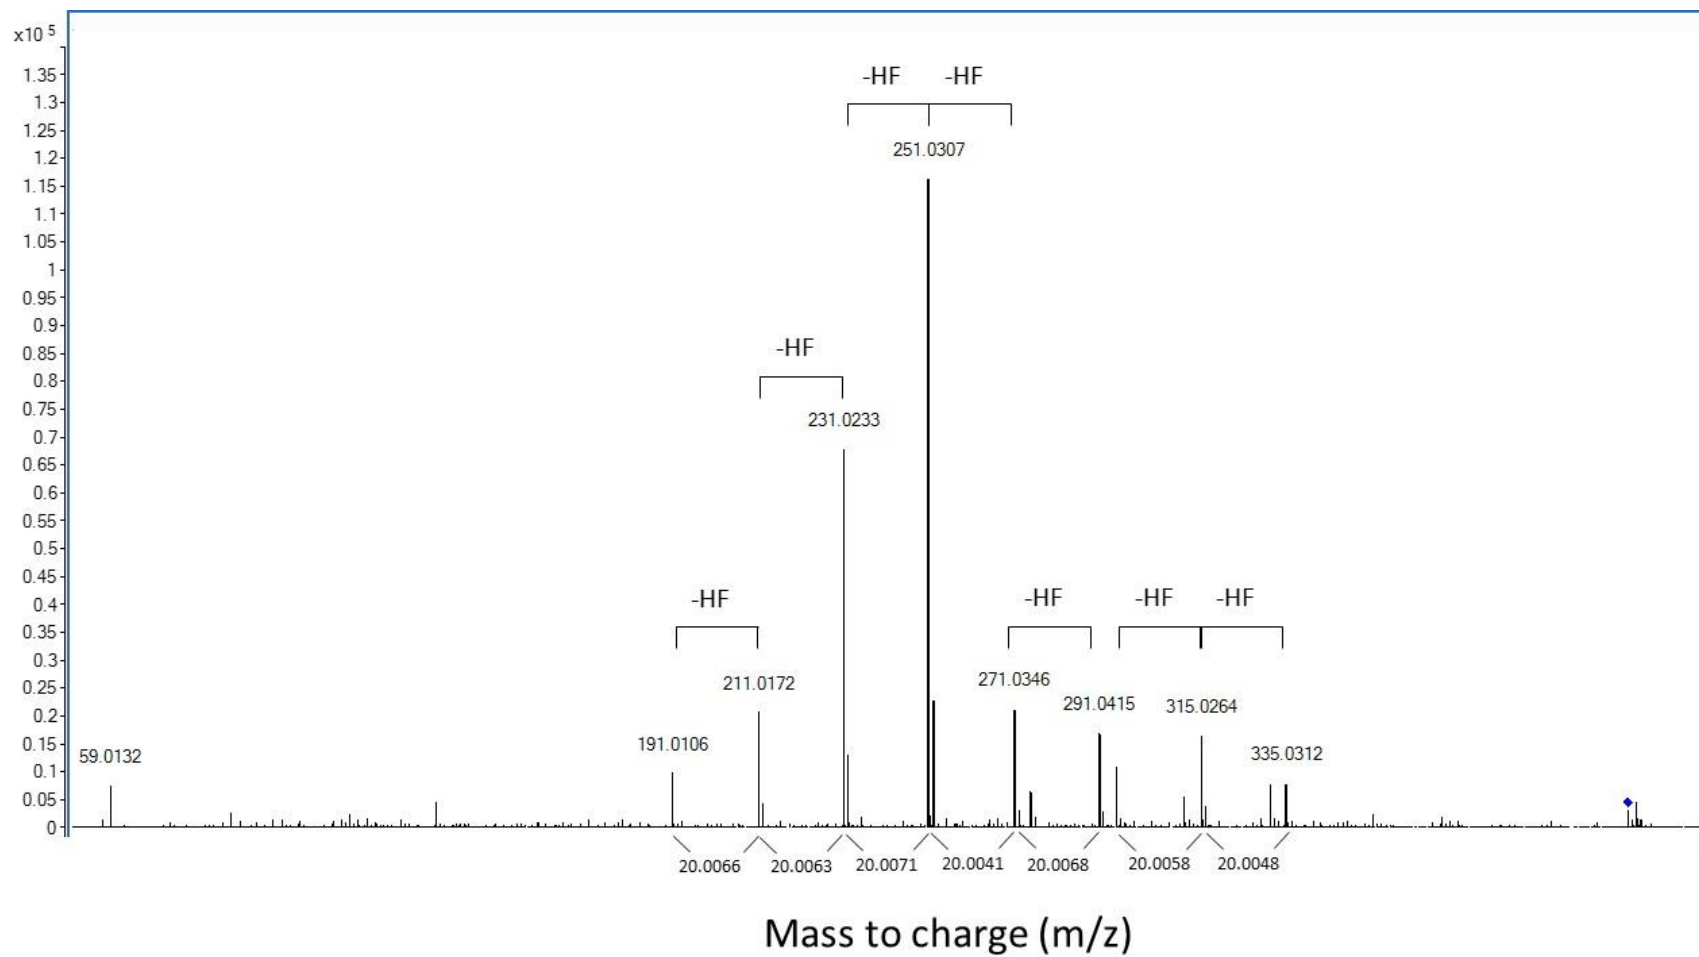

Figure S2 -MS/MS spectrum of  $C_{12}H_{12}F_{12}O_2$  (415.0576  $m/z$ ) as an example spectrum in the  $C_{2n}H_{2n}F_{2n}O_2$  series.

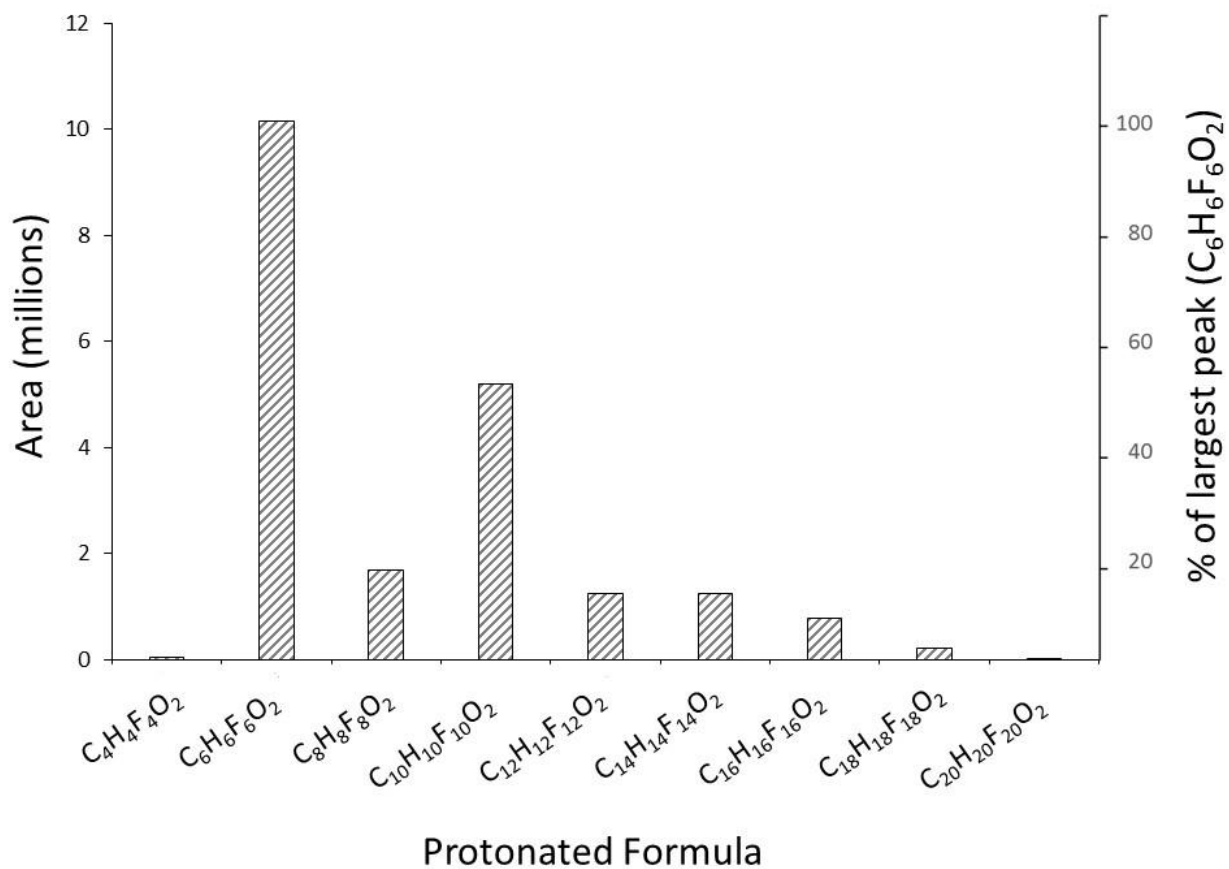

Figure S3 - Total area (sum of all isomers) of different species and their relative percentages in related series at Site 2.

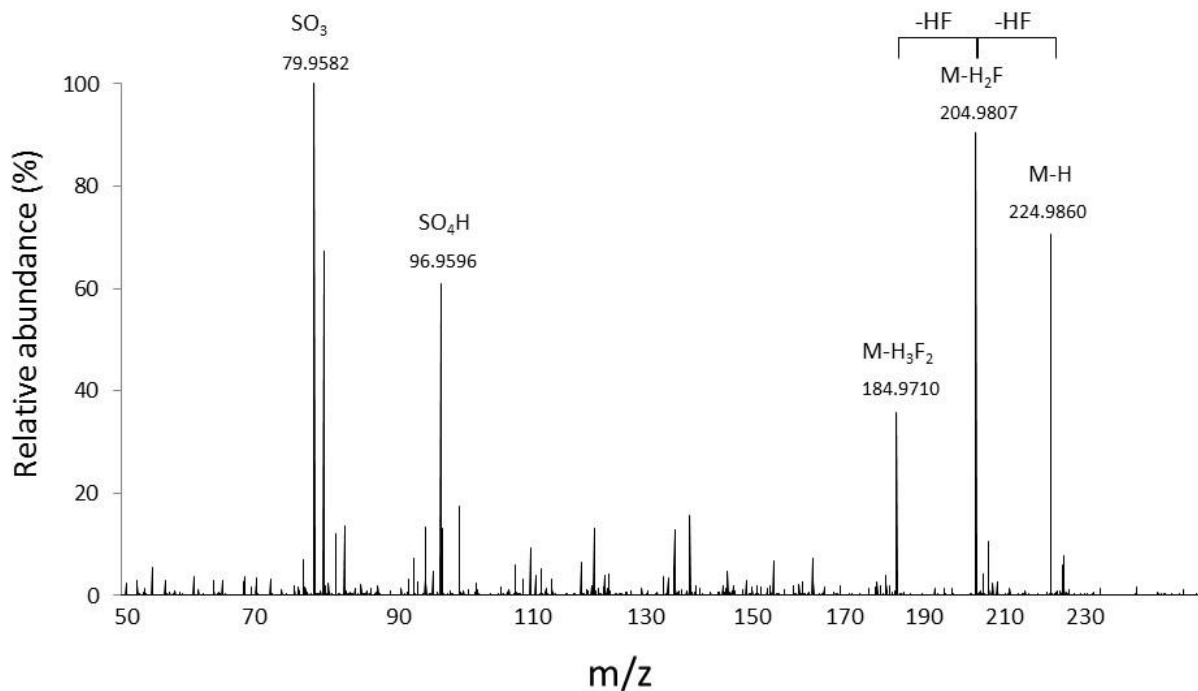

Figure S4 - MS/MS spectrum of the sulfate compound at 224.9860 m/z with formula C<sub>4</sub>H<sub>6</sub>F<sub>4</sub>SO<sub>4</sub>

### Proposed structures for 224.9860 m/z:

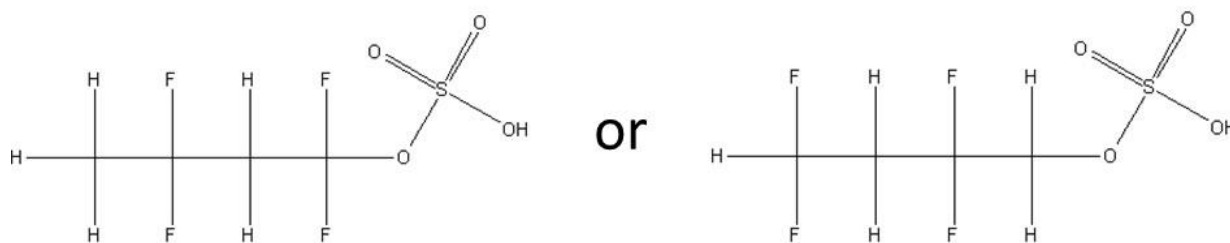

Figure S5 - Two possible structures for the sulfate compound at 224.9860 m/z and formula C<sub>4</sub>H<sub>6</sub>F<sub>4</sub>SO<sub>4</sub>

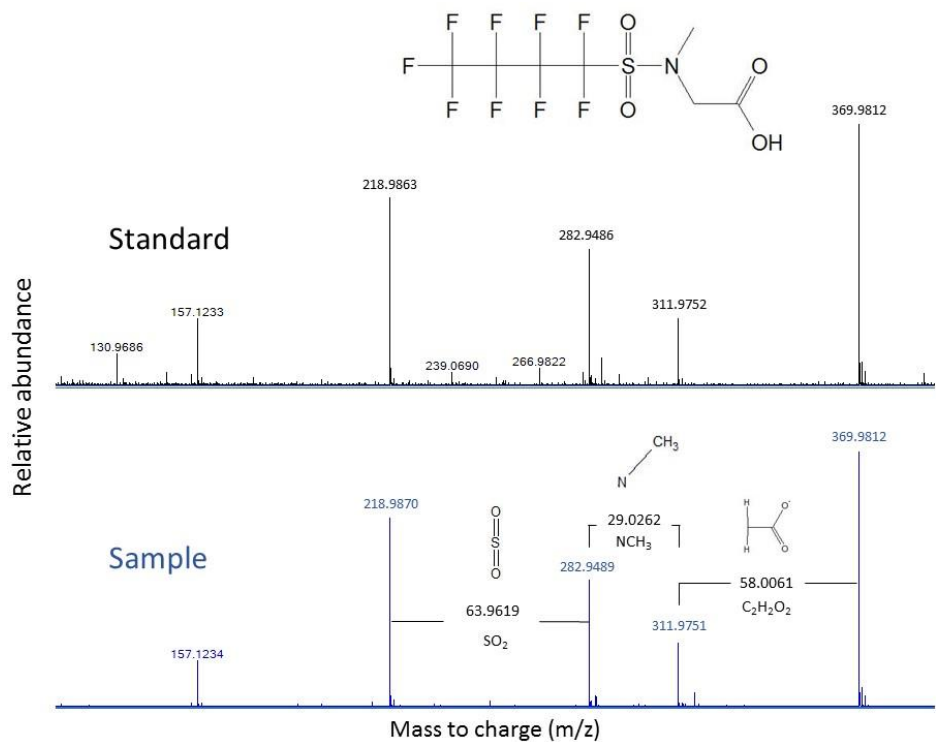

Figure S6 - MS spectra of N-MeFBSAA in the standard (above) and sample (below) with the corresponding structures for the most predominant fragments.

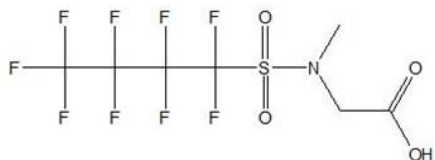

N-methyl perfluorobutane  
sulfonamidoacetic acid  
(MeFBSAA)

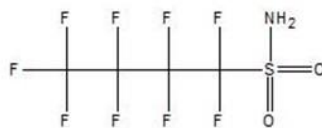

perfluorobutane  
sulfonamide  
(FBSA)

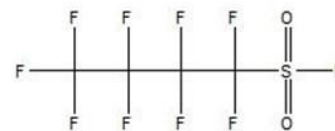

perfluorobutane  
sulfinic acid

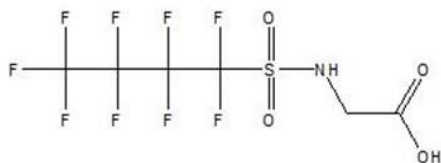

perfluorobutane  
sulfonamidoacetic  
acid  
(FBSAA)

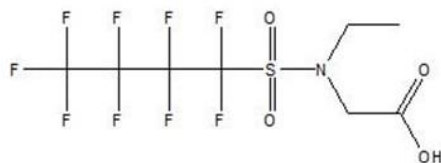

N-ethyl perfluorobutane  
sulfonamidoacetic acid  
(EtFBSAA)

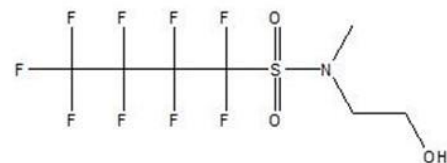

N-methyl  
perfluorobutane  
sulfonamdoethanol  
(MeFBSE)

Figure S7 – Structures, names, and abbreviations for perfluorobutane sulfonamides (PBSAs)

## SI References

1. Schymanski, E. L.; Jeon, J.; Gulde, R.; Fenner, K.; Ruff, M.; Singer, H. P.; Hollender, J., Identifying small molecules via high resolution mass spectrometry: communicating confidence. *Environmental science & technology* **2014**, *48*, (4), 2097-2098.
2. Myers, A. L.; Jobst, K. J.; Mabury, S. A.; Reiner, E. J., Using mass defect plots as a discovery tool to identify novel fluoropolymer thermal decomposition products. *Journal of Mass Spectrometry* **2014**, *49*, (4), 291-296.
3. Jobst, K. J.; Shen, L.; Reiner, E. J.; Taguchi, V. Y.; Helm, P. A.; McCrindle, R.; Backus, S., The use of mass defect plots for the identification of (novel) halogenated contaminants in the environment. *Anal. Bioanal. Chem.* **2013**, *405*, (10), 3289-3297.
4. Liu, Y.; Pereira, A. D. S.; Martin, J. W., Discovery of C5–C17 Poly- and Perfluoroalkyl Substances in Water by In-Line SPE-HPLC-Orbitrap with In-Source Fragmentation Flagging. *Analytical chemistry* **2015**, *87*, (8), 4260-4268.
5. Kendrick, E., A Mass Scale Based on CH<sub>2</sub>= 14.0000 for High Resolution Mass Spectrometry of Organic Compounds. *Analytical Chemistry* **1963**, *35*, (13), 2146-2154.
